# Supplementary material for: Anisotropic fluorescent materials via self-organization of perylenedicarboximide
Source: Royal Society of Chemistry journal article supplement (doi:10.1039/b615802a), 2007-01-01
Supplement: b615802a-2.pdf [file b615802a-2.pdf]

**Table 4. Anisotropic displacement parameters ( $\text{\AA}^2 \times 10^3$ ) for perylenemonoimide 1. The anisotropic displacement factor exponent takes the form:  $-2p^2[h^2 a^* U^{11} + \dots + 2 h k a^* b^* U^{12}]$**

|       | $U^{11}$ | $U^{22}$ | $U^{33}$ | $U^{23}$ | $U^{13}$ | $U^{12}$ |
|-------|----------|----------|----------|----------|----------|----------|
| C(1)  | 21(1)    | 21(1)    | 21(1)    | 1(1)     | 2(1)     | -3(1)    |
| C(2)  | 16(1)    | 16(1)    | 18(1)    | 1(1)     | 0(1)     | -3(1)    |
| C(3)  | 16(1)    | 18(1)    | 15(1)    | 0(1)     | 0(1)     | -5(1)    |
| C(4)  | 16(1)    | 19(1)    | 17(1)    | 0(1)     | 1(1)     | -2(1)    |
| C(5)  | 22(1)    | 19(1)    | 19(1)    | 0(1)     | -1(1)    | -2(1)    |
| C(6)  | 23(1)    | 23(1)    | 16(1)    | 1(1)     | 4(1)     | 1(1)     |
| C(7)  | 23(1)    | 25(1)    | 14(1)    | 5(1)     | 0(1)     | -2(1)    |
| C(8)  | 17(1)    | 18(1)    | 20(1)    | 1(1)     | 1(1)     | -3(1)    |
| C(9)  | 17(1)    | 20(1)    | 20(1)    | 3(1)     | -1(1)    | -3(1)    |
| C(10) | 25(1)    | 26(1)    | 23(1)    | 4(1)     | -1(1)    | -2(1)    |
| C(11) | 29(1)    | 25(1)    | 25(1)    | 9(1)     | -6(1)    | -3(1)    |
| C(12) | 25(1)    | 23(1)    | 33(1)    | 6(1)     | -4(1)    | 1(1)     |
| C(13) | 18(1)    | 20(1)    | 30(1)    | 3(1)     | -1(1)    | -2(1)    |
| C(14) | 23(1)    | 22(1)    | 37(2)    | 4(1)     | 1(1)     | 4(1)     |
| C(15) | 23(1)    | 25(1)    | 30(1)    | -2(1)    | 6(1)     | 3(1)     |
| C(16) | 22(1)    | 23(1)    | 24(1)    | 2(1)     | 4(1)     | 0(1)     |
| C(17) | 18(1)    | 17(1)    | 23(1)    | 2(1)     | 2(1)     | -2(1)    |
| C(18) | 16(1)    | 18(1)    | 18(1)    | 3(1)     | 0(1)     | -3(1)    |
| C(19) | 21(1)    | 24(1)    | 18(1)    | 0(1)     | 4(1)     | 0(1)     |
| C(20) | 21(1)    | 23(1)    | 16(1)    | 4(1)     | -2(1)    | 0(1)     |
| C(21) | 17(1)    | 18(1)    | 18(1)    | 3(1)     | 0(1)     | -3(1)    |
| C(22) | 16(1)    | 19(1)    | 24(1)    | 3(1)     | -2(1)    | -4(1)    |
| C(23) | 21(1)    | 21(1)    | 21(1)    | 3(1)     | 1(1)     | 4(1)     |
| C(24) | 22(1)    | 22(1)    | 31(1)    | 3(1)     | 3(1)     | 2(1)     |
| C(25) | 38(2)    | 25(1)    | 35(2)    | -1(1)    | -1(1)    | 9(1)     |
| C(26) | 47(2)    | 54(2)    | 25(2)    | 0(1)     | -2(1)    | 11(1)    |
| C(27) | 51(2)    | 31(1)    | 34(2)    | 10(1)    | 10(1)    | 13(1)    |
| C(28) | 62(2)    | 46(2)    | 23(1)    | 7(1)     | 9(1)     | 16(1)    |
| N(1)  | 20(1)    | 18(1)    | 19(1)    | 1(1)     | -1(1)    | 2(1)     |
| N(2)  | 32(1)    | 22(1)    | 24(1)    | 5(1)     | 2(1)     | 8(1)     |
| O(1)  | 30(1)    | 30(1)    | 21(1)    | 2(1)     | 5(1)     | 8(1)     |
| O(2)  | 34(1)    | 26(1)    | 18(1)    | 6(1)     | -1(1)    | 5(1)     |

**Table 5. Hydrogen coordinates (  $\times 10^4$ ) and isotropic displacement parameters ( $\text{\AA}^2 \times 10^{-3}$ ) for perylenemonoimide 1.**

|        | x     | y     | z    | U(eq) |
|--------|-------|-------|------|-------|
| H(6)   | 624   | 5419  | 4483 | 25    |
| H(7)   | 3520  | 4197  | 4709 | 25    |
| H(10)  | 6013  | 3107  | 4885 | 30    |
| H(11)  | 9164  | 1944  | 5088 | 32    |
| H(12)  | 11417 | 1291  | 3934 | 32    |
| H(14)  | 12205 | 1181  | 2355 | 33    |
| H(15)  | 11286 | 1667  | 981  | 31    |
| H(16)  | 8270  | 2862  | 760  | 27    |
| H(19)  | 5352  | 3837  | 559  | 25    |
| H(20)  | 2413  | 5050  | 373  | 24    |
| H(23A) | -5088 | 7113  | 2521 | 25    |
| H(23B) | -4524 | 7073  | 1508 | 25    |
| H(24A) | -837  | 8170  | 2779 | 30    |
| H(24B) | -593  | 8183  | 1751 | 30    |
| H(25A) | -4286 | 10127 | 2840 | 39    |
| H(25B) | -1246 | 9718  | 3026 | 39    |
| H(26A) | -6473 | 9037  | 3720 | 63    |
| H(26B) | -3823 | 9592  | 4268 | 63    |
| H(26C) | -3537 | 8549  | 3860 | 63    |
| H(27A) | -1767 | 9601  | 1303 | 45    |
| H(27B) | -4941 | 9909  | 1419 | 45    |
| H(28A) | -3543 | 8220  | 509  | 64    |
| H(28B) | -4901 | 9087  | 77   | 64    |
| H(28C) | -6761 | 8443  | 684  | 64    |

**Table 6. Torsion angles [°] for perylenemonoimide 1.**

|                         |             |                         |             |
|-------------------------|-------------|-------------------------|-------------|
| O(1)-C(1)-C(2)-C(6)     | 0.2(3)      | C(5)-C(4)-C(20)-C(19)   | 178.99(19)  |
| N(1)-C(1)-C(2)-C(6)     | -179.27(18) | C(18)-C(19)-C(20)-C(4)  | -1.6(3)     |
| O(1)-C(1)-C(2)-C(3)     | 179.89(19)  | C(2)-C(3)-C(21)-C(8)    | 0.9(3)      |
| N(1)-C(1)-C(2)-C(3)     | 0.4(3)      | C(4)-C(3)-C(21)-C(8)    | -179.42(19) |
| C(6)-C(2)-C(3)-C(4)     | -179.02(19) | C(2)-C(3)-C(21)-C(18)   | -179.54(18) |
| C(1)-C(2)-C(3)-C(4)     | 1.3(3)      | C(4)-C(3)-C(21)-C(18)   | 0.2(3)      |
| C(6)-C(2)-C(3)-C(21)    | 0.7(3)      | C(7)-C(8)-C(21)-C(3)    | -1.2(3)     |
| C(1)-C(2)-C(3)-C(21)    | -178.99(19) | C(9)-C(8)-C(21)-C(3)    | 179.23(19)  |
| C(2)-C(3)-C(4)-C(20)    | -179.34(19) | C(7)-C(8)-C(21)-C(18)   | 179.24(19)  |
| C(21)-C(3)-C(4)-C(20)   | 0.9(3)      | C(9)-C(8)-C(21)-C(18)   | -0.4(3)     |
| C(2)-C(3)-C(4)-C(5)     | 1.4(3)      | C(19)-C(18)-C(21)-C(3)  | -2.0(3)     |
| C(21)-C(3)-C(4)-C(5)    | -178.32(19) | C(17)-C(18)-C(21)-C(3)  | 179.29(19)  |
| C(20)-C(4)-C(5)-O(2)    | -4.5(3)     | C(19)-C(18)-C(21)-C(8)  | 177.64(19)  |
| C(3)-C(4)-C(5)-O(2)     | 174.70(19)  | C(17)-C(18)-C(21)-C(8)  | -1.1(3)     |
| C(20)-C(4)-C(5)-N(1)    | 175.02(18)  | C(14)-C(13)-C(22)-C(9)  | -179.73(18) |
| C(3)-C(4)-C(5)-N(1)     | -5.8(3)     | C(12)-C(13)-C(22)-C(9)  | -0.4(3)     |
| C(3)-C(2)-C(6)-C(7)     | -2.0(3)     | C(14)-C(13)-C(22)-C(17) | 0.0(3)      |
| C(1)-C(2)-C(6)-C(7)     | 177.7(2)    | C(12)-C(13)-C(22)-C(17) | 179.33(19)  |
| C(2)-C(6)-C(7)-C(8)     | 1.7(3)      | C(10)-C(9)-C(22)-C(13)  | -0.9(3)     |
| C(6)-C(7)-C(8)-C(21)    | -0.1(3)     | C(8)-C(9)-C(22)-C(13)   | 178.13(19)  |
| C(6)-C(7)-C(8)-C(9)     | 179.5(2)    | C(10)-C(9)-C(22)-C(17)  | 179.37(19)  |
| C(7)-C(8)-C(9)-C(10)    | 1.1(3)      | C(8)-C(9)-C(22)-C(17)   | -1.6(3)     |
| C(21)-C(8)-C(9)-C(10)   | -179.27(19) | C(16)-C(17)-C(22)-C(13) | -0.1(3)     |
| C(7)-C(8)-C(9)-C(22)    | -177.87(18) | C(18)-C(17)-C(22)-C(13) | -179.61(19) |
| C(21)-C(8)-C(9)-C(22)   | 1.7(3)      | C(16)-C(17)-C(22)-C(9)  | 179.57(18)  |
| C(22)-C(9)-C(10)-C(11)  | 1.5(3)      | C(18)-C(17)-C(22)-C(9)  | 0.1(3)      |
| C(8)-C(9)-C(10)-C(11)   | -177.5(2)   | N(1)-C(23)-C(24)-N(2)   | -173.76(18) |
| C(9)-C(10)-C(11)-C(12)  | -0.7(3)     | O(2)-C(5)-N(1)-C(1)     | -172.6(2)   |
| C(10)-C(11)-C(12)-C(13) | -0.6(3)     | C(4)-C(5)-N(1)-C(1)     | 7.9(3)      |
| C(11)-C(12)-C(13)-C(14) | -179.5(2)   | O(2)-C(5)-N(1)-C(23)    | 1.5(3)      |
| C(11)-C(12)-C(13)-C(22) | 1.2(3)      | C(4)-C(5)-N(1)-C(23)    | -178.02(19) |
| C(12)-C(13)-C(14)-C(15) | -179.8(2)   | O(1)-C(1)-N(1)-C(5)     | 175.26(19)  |
| C(22)-C(13)-C(14)-C(15) | -0.5(3)     | C(2)-C(1)-N(1)-C(5)     | -5.3(3)     |
| C(13)-C(14)-C(15)-C(16) | 1.1(3)      | O(1)-C(1)-N(1)-C(23)    | 1.1(3)      |
| C(14)-C(15)-C(16)-C(17) | -1.3(3)     | C(2)-C(1)-N(1)-C(23)    | -179.42(18) |
| C(15)-C(16)-C(17)-C(22) | 0.8(3)      | C(24)-C(23)-N(1)-C(5)   | -88.4(2)    |
| C(15)-C(16)-C(17)-C(18) | -179.8(2)   | C(24)-C(23)-N(1)-C(1)   | 86.1(2)     |
| C(16)-C(17)-C(18)-C(19) | 3.1(3)      | C(26)-C(25)-N(2)-C(24)  | -73.3(2)    |
| C(22)-C(17)-C(18)-C(19) | -177.45(19) | C(26)-C(25)-N(2)-C(27)  | 160.91(19)  |
| C(16)-C(17)-C(18)-C(21) | -178.20(18) | C(23)-C(24)-N(2)-C(25)  | 128.2(2)    |
| C(22)-C(17)-C(18)-C(21) | 1.3(3)      | C(23)-C(24)-N(2)-C(27)  | -106.5(2)   |
| C(21)-C(18)-C(19)-C(20) | 2.7(3)      | C(28)-C(27)-N(2)-C(25)  | -170.0(2)   |
| C(17)-C(18)-C(19)-C(20) | -178.59(19) | C(28)-C(27)-N(2)-C(24)  | 64.7(3)     |
| C(3)-C(4)-C(20)-C(19)   | -0.2(3)     |                         |             |
